# Supplementary material
Source: publisher figshare collection journal article supplement (https://springernature.figshare.com/ndownloader/files/16847306)
Supplement: Supplementary file 1 [file 16847306]

Top Canonical Pathways

| Name                                    | p-value  | Overlap       |
|-----------------------------------------|----------|---------------|
| LXR/RXR Activation                      | 7.09E-20 | 12.4 % 15/121 |
| FXR/RXR Activation                      | 6.52E-18 | 11.1 % 14/126 |
| Complement System                       | 3.80E-15 | 24.3 % 9/37   |
| Acute Phase Response Signaling          | 2.36E-14 | 7.4 % 13/176  |
| Clathrin-mediated Endocytosis Signaling | 5.06E-07 | 3.8 % 8/209   |

Top Networks

| ID | Associated Network Functions                                                                        | Score |
|----|-----------------------------------------------------------------------------------------------------|-------|
| 1  | Humoral Immune Response, Inflammatory Response, Developmental Disorder                              | 52    |
| 2  | Cellular Movement, Immune Cell Trafficking, Infectious Diseases                                     | 35    |
| 3  | Molecular Transport, Small Molecule Biochemistry, Cellular Development                              | 35    |
| 4  | Neurological Disease, Organismal Injury and Abnormalities, Psychological Disorders                  | 23    |
| 5  | Cardiovascular Disease, Organismal Injury and Abnormalities, Cell-To-Cell Signaling and Interaction | 9     |
